# Supplementary material
Source: publisher figshare collection journal article supplement (https://acs.figshare.com/ndownloader/files/4638853)
Supplement: Supplementary file 1 [file 4638853]

# Supplementary materials

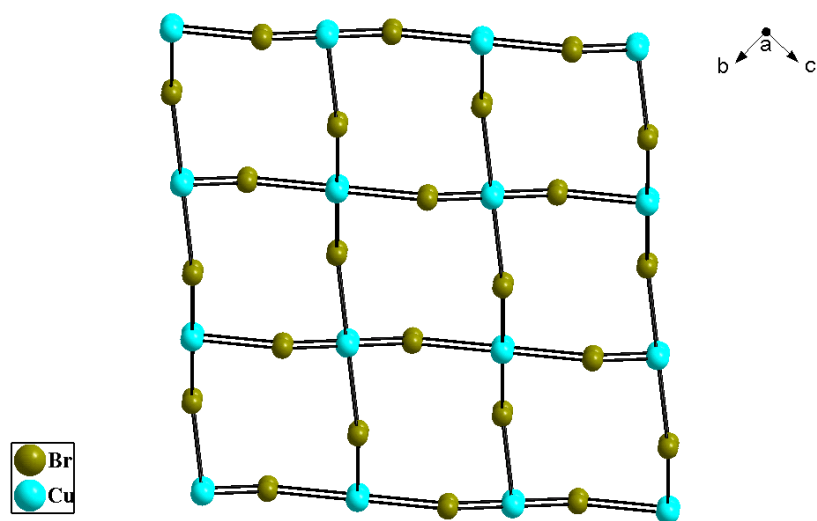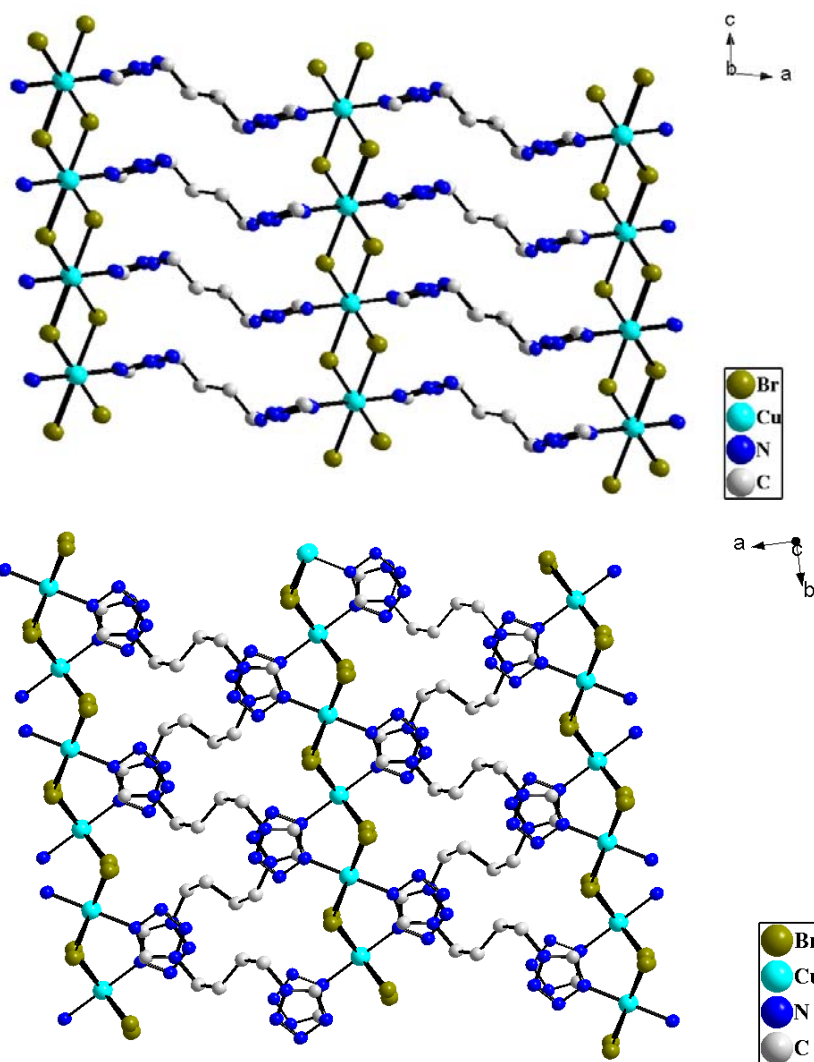

**Figure S2.** 3-D networks of **2** along *b* (up) and *c* (down) axis.

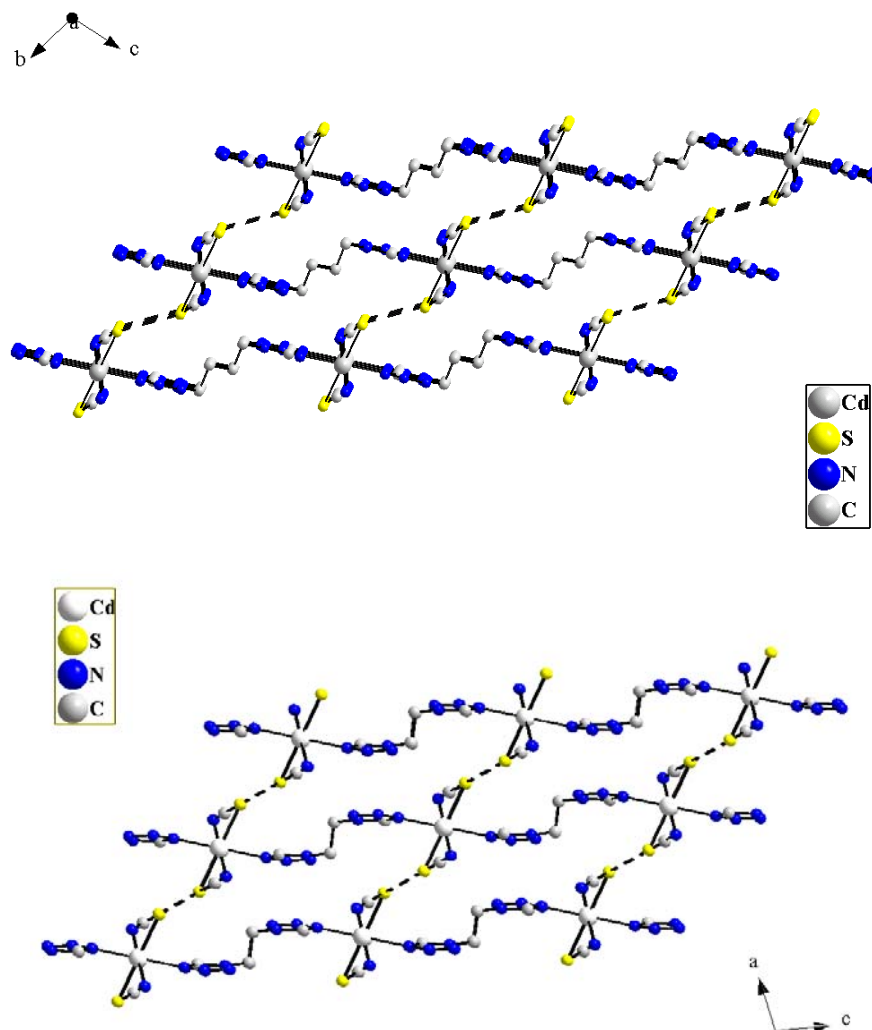

**Figure S3.** 3-D supramolecular networks of **3** (up) and **4** (down) extended by weak intermolecular S...S interactions.

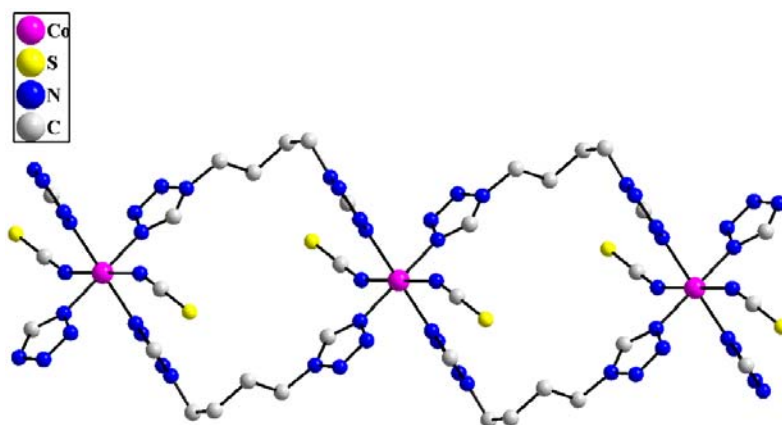

**Figure S4.** A 1-D chained structure of **6**.

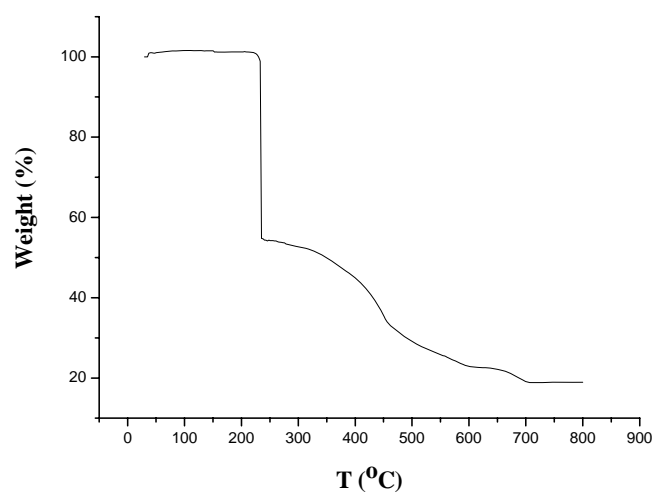

**Figure S5.** TG curve of **5**.
